# Supplementary material for: CDH1 somatic alterations in Mexican patients with diffuse and mixed sporadic gastric cancer
Source: PubMed Central journal article supplement (PMC6332846; doi:10.1186/s12885-019-5294-0), 2019-01-14
Supplement: 12885_2019_5294_MOESM2_ESM.pdf [file 12885_2019_5294_MOESM2_ESM.pdf]

## Additional file 2

Table S1. Characteristics and alterations found in all the patients.

| DIFFUSE GASTRIC CANCER CASES |     |     |          |                  |                     |                                                                                |                                          |       |         |
|------------------------------|-----|-----|----------|------------------|---------------------|--------------------------------------------------------------------------------|------------------------------------------|-------|---------|
| ID                           | Sex | Age | Hemotype | <i>H. pylori</i> | Family history      | Variants                                                                       | Geno-type                                | LOH   | Methyl. |
| 1D                           | M   | 68  | A+       | -                | No                  | c.1138-75insA<br>c.2076T>C<br>c.48+6C>T                                        | in/del<br>C/C<br>T/T                     | NA    | NA      |
| 2D                           | M   | 57  | A-       | +                | No                  | c.2076T>C                                                                      | C/C                                      | -     | +       |
| 3D                           | M   | 38  | NI       | +                | No                  | c.-197A>C /<br>c.-73A>C<br>c.48+6C>T<br>c.2076T>C<br>c.2164+17dupA<br>c.*54C>A | A/C<br>C/T<br>T/C<br>dupA/dupA<br>C/A    | -     | +       |
| 4D                           | M   | 54  | O+       | +                | No                  | c.48+6C>T<br>c.1138-75insA<br>c.2076T>C                                        | C/T<br>in/del<br>C/C                     | -     | +       |
| 5D                           | M   | 63  | A+       | +                | No                  | c.-160C>A /<br>c.-285C>A<br>c.48+6C>T<br>c.2076T>C                             | A/A<br>T/T<br>T/C                        | -     | +       |
| 6D                           | F   | 86  | A+       | -                | Yes<br>(1st degree) | c.48+6C>T<br>c.531+10G>C<br>c.1138-75insA<br>c.2076T>C<br>c.2164+17dupA        | C/T<br>G/C<br>in/del<br>T/C<br>dupA/dupA | -     | +       |
| 7D                           | M   | 57  | A-       | -                | No                  | c.-137C>A<br>c.48+6C>T                                                         | C/A<br>T/T                               | LOH + | +       |

|     |   |    |    |   |                        |                                                                                                             |                                                               |                        |   |
|-----|---|----|----|---|------------------------|-------------------------------------------------------------------------------------------------------------|---------------------------------------------------------------|------------------------|---|
|     |   |    |    |   |                        | c.388-44G>A<br>c.2076T>C<br>c.2164+17dupA                                                                   | G/A<br>T/C<br>dupA/dupA                                       |                        |   |
| 8D  | M | 70 | B+ | + | Yes<br>(1st<br>degree) | c.-176C>T<br>c.48+6C>T<br>c.1138-75insA<br>c.1680G>A<br>c.2076T>C<br>c.2164+17dupA<br>c.2253C>A<br>c.*54C>A | C/T<br>C/T<br>ins/del<br>G/A<br>C/C<br>del/dupA<br>C/A<br>C/A | LOH<br>Border<br>-line | - |
| 9D  | F | 64 | NI | - | No                     | c.48+6C>T<br>c.1221insC<br>c.2076T>C<br>c.2164+17dupA                                                       | T/T<br>ins/del<br>T/C<br>dupA/dupA                            | -                      | + |
| 10D | M | 74 | B+ | + | No                     | c.-160C>A /<br>c.-285C>A<br>c.48+6C>T<br>c.2076T>C<br>c.2164+17dupA<br>c.48+6C>T                            | C/A<br>C/T<br>C/C<br>dupA/dupA<br>T/T                         | -                      | - |
| 11D | F | 53 | A+ | + | Yes<br>(2nd<br>degree) | c.2076T>C<br>c.2164+17dupA<br>c.2253C>A<br>c.*54C>A                                                         | C/C<br>del/dupA<br>C/A<br>C/A                                 | -                      | - |
| 12D | F | 45 | O+ | - | No                     | c.-160C>A /<br>c.-285C>A<br>c.-197A>C /<br>c.-73A>C<br>c.48+6C>T<br>c.1138-92delA                           | C/A<br>A/C<br>T/T<br>ins/del                                  | NA                     | - |

|                 |                      |                  |                                                  |                          |                                |               |           |       |       |
|-----------------|----------------------|------------------|--------------------------------------------------|--------------------------|--------------------------------|---------------|-----------|-------|-------|
|                 |                      |                  |                                                  |                          |                                | c.2076T>C     | C/C       |       |       |
|                 |                      |                  |                                                  |                          |                                | c.2164+17dupA | del/dupA  |       |       |
|                 |                      |                  |                                                  |                          |                                | c.2253C>A     | C/A       |       |       |
|                 |                      |                  |                                                  |                          |                                | c.*54C>A      | C/A       |       |       |
|                 |                      |                  |                                                  |                          |                                | c.48+6C>T     | T/T       |       |       |
| 13D             | F                    | 53               | O+                                               | NA                       | Yes<br>(2nd<br>degree)         | c.1138-92delA | ins/del   | NA    | NA    |
|                 |                      |                  |                                                  |                          |                                | c.2076T>C     | C/C       |       |       |
|                 |                      |                  |                                                  |                          |                                | c.2164+17dupA | dupA/dupA |       |       |
| Total<br>(n=13) | M: 61.5%<br>F: 38.5% | 60.75<br>(30-86) | A+: 36.4%<br>A-: 18.2%<br>B+: 18.2%<br>O+: 27.2% | (+): 58.3%<br>(-): 41.7% | 1st d.: 15.4%<br>2nd d.: 15.4% |               |           | 13.3% | 63.6% |

#### MIXED GASTRIC CANCER CASES

| ID | Sex | Age | Hemotype | <i>H. pylori</i> | Family history         | Variants                                                                 | Genotype                                 | Allelic Loss | Methyl. |
|----|-----|-----|----------|------------------|------------------------|--------------------------------------------------------------------------|------------------------------------------|--------------|---------|
| 1M | M   | 79  | A+       | +                | Yes<br>(1st<br>degree) | c.48+6C>T<br>c.2076T>C                                                   | T/T<br>T/C                               | -            | +       |
| 2M | M   | 72  | O+       | -                | Yes<br>(2nd<br>degree) | c.48+6C>T<br>c.1138-75insA<br>c.2076T>C<br>c.2164+17dupA                 | C/T<br>in/del<br>C/C<br>dupA/dupA        | -            | +       |
| 3M | F   | 58  | B+       | +                | Yes<br>(1st<br>degree) | c.48+6C>T<br>c.1138-75insA<br>c.1937-13T>C<br>c.2076T>C<br>c.2164+17dupA | C/T<br>in/del<br>T/C<br>T/C<br>dupA/dupA | -            | +       |
| 4M | F   | 62  | O+       | -                | Yes<br>(1st<br>degree) | c.48+6C>T<br>c.2076T>C<br>c.2439+52G>A                                   | T/T<br>C/C<br>A/A                        | -            | -       |
| 5M | M   | NI  | O+       | +                | NI                     | c.48+6C>T                                                                | C/T                                      | NA           | -       |

|                |                      |                 |                                     |                    |                                |                                                                                                                                                                                     |                                                                                          |  |    |       |
|----------------|----------------------|-----------------|-------------------------------------|--------------------|--------------------------------|-------------------------------------------------------------------------------------------------------------------------------------------------------------------------------------|------------------------------------------------------------------------------------------|--|----|-------|
|                |                      |                 |                                     |                    |                                | c.-197A>C /<br>c.-73A>C<br>c.2076T>C<br>c.2164+17dupA<br>c.2253C>A<br>c.*54C>A<br>c.48+6C>T<br>c.-160C>A /<br>c.-285C>A<br>c.1221insC<br>c.1937-13T>C<br>c.2076T>C<br>c.2164+17dupA | A/C<br>T/C<br>del/dupA<br>C/A<br>C/A<br>T/T<br>C/A<br>ins/del<br>T/C<br>T/C<br>dupA/dupA |  |    |       |
| 6M             | M                    | 78              | O+                                  | NR                 | Yes<br>(1st<br>degree)         | c.48+6C>T<br>-160C>A /<br>c.-285C>A<br>c.1138-92delA<br>c.1937-13T>C<br>c.2076T>C                                                                                                   | C/T<br>C/A<br>ins/del<br>C/C<br>C/C                                                      |  | NA | NA    |
| 7M             | M                    | 78              | A+                                  | -                  | No                             |                                                                                                                                                                                     |                                                                                          |  | -  | +     |
| Total<br>(n=7) | M: 71.4%<br>F: 28.6% | 71.2<br>(58-79) | A+: 28.6%<br>B+: 14.3%<br>O+: 57.1% | (+) 50%<br>(-) 50% | 1st d.: 57.1%<br>2nd d.: 14.3% |                                                                                                                                                                                     |                                                                                          |  | 0% | 36.4% |

LOH: loss of heterozygosity; NA: not analyzed;
