# Supplementary material for: CDH1 somatic alterations in Mexican patients with diffuse and mixed sporadic gastric cancer
Source: Springer Nature journal article supplement (doi:10.1186/s12885-019-5294-0), 2019-01-14
Supplement: MOESM3 [file 16396344]

**Additional file 3***Table S2. Genotypes of the microsatellites markers used for the LOH analysis.*

| <b>DIFFUSE GASTRIC CANCER</b> |                 |                |                 |            |
|-------------------------------|-----------------|----------------|-----------------|------------|
| <b>Sample</b>                 | <b>D16S3025</b> | <b>D16S496</b> | <b>D16S3067</b> | <b>LOH</b> |
| 2D-C                          | 97/101          | 218/222        | 148/150         | No         |
| 2D-T                          | 97/101          | 218/222        | 148/150         |            |
| 3D-C                          | 99/101          | 209/220        | 148/154         | No         |
| 3D-T                          | 99/101          | 209/220        | 148/154         |            |
| 4D-C                          | 95/101          | 221/223        | 148/154         | No         |
| 4D-T                          | 95/101          | 221/223        | 148/154         |            |
| 5D-C                          | 103/103         | 218/220        | 146/152         | No         |
| 5D-T                          | 103/103         | 218/220        | 146/152         |            |
| 6D-C                          | 97/101          | 209/218        | 144/150         | No         |
| 6D-T                          | 97/101          | 209/218        | 144/150         |            |
| 7D-C                          | 88/88           | 220/222        | 150/152         | LOH        |
| 7D-T                          | 87/102          | 219/221        | 150/152         |            |
| 8D-C                          | 101/101         | 210/221        | 148/152         | LOH        |
| 8D-T                          | 101/101         | 210/221        | 148/152         |            |
| 9D-C                          | 99/101          | 220/220        | 148/152         | No         |
| 9D-T                          | 99/101          | 220/220        | 148/152         |            |
| 10D-C                         | 101/103         | 219/221        | 148/152         | No         |
| 10D-T                         | 101/103         | 219/221        | 148/152         |            |
| 11D-C                         | 101/103         | 209/220        | 146/148         | No         |
| 11D-T                         | 101/103         | 209/220        | 146/148         |            |
| <b>MIXED GASTRIC CANCER</b>   |                 |                |                 |            |
| <b>Sample</b>                 | <b>D16S3025</b> | <b>D16S496</b> | <b>D16S3067</b> | <b>LOH</b> |
| 1M-C                          | 95/102          | 222/224        | 150/152         | No         |
| 1M-T                          | 95/102          | 222/224        | 150/152         |            |
| 2M-C                          | 99/101          | 220/220        | 152/154         | No         |
| 2M-T                          | 99/101          | 220/220        | 152/154         |            |
| 3M-C                          | 101/103         | 142/148        | 210/221         | No         |
| 3M-T                          | 101/103         | 142/148        | 210/221         |            |
| 4M-C                          | 101/102         | 218/220        | 144/152         | No         |
| 4M-T                          | 101/102         | 218/220        | 144/152         |            |
| 7M-C                          | 87/104          | 210/223        | 152/154         | No         |
| 7M-T                          | 87/104          | 210/223        | 152/154         |            |
