# Supplementary material for: CDH1 somatic alterations in Mexican patients with diffuse and mixed sporadic gastric cancer
Source: Springer Nature journal article supplement (doi:10.1186/s12885-019-5294-0), 2019-01-14
Supplement: MOESM4 [file 16396344]

**Additional file 4**

*Table S3. SNP frequencies in Hispanic populations.*

| rs          | 2n               | Alt. Allele (IG)         | Frequency in Hispanics (IG Source) |                            |                            |                  | 2n                       | Alt. Allele (AF)           | Frequency in Hispanics (AF Source) |                            |             |  | Present study* |
|-------------|------------------|--------------------------|------------------------------------|----------------------------|----------------------------|------------------|--------------------------|----------------------------|------------------------------------|----------------------------|-------------|--|----------------|
| rs16260     | 100              | A:<br>0.280 <sup>a</sup> | C/C:<br>0.620 <sup>a</sup>         | C/A:<br>0.300 <sub>a</sub> | A/A:<br>0.080 <sup>a</sup> | 186              | A:<br>0.280 <sup>b</sup> | C/C:<br>0.510 <sub>b</sub> | C/A:<br>0.430 <sub>b</sub>         | A/A:<br>0.070 <sub>b</sub> | A:<br>0.125 |  |                |
| rs28372783  | 44               | C:<br>0.068              | A/A:<br>0.864                      | A/C:<br>0.136              | C/C:<br>0.000              | 42               | C:<br>0.071              | A/A:<br>0.904              | A/C:<br>0.048                      | C/C:<br>0.047              | A:<br>0.075 |  |                |
| rs34500817  | 44               | T:<br>0.000              | C/C:<br>1.000                      | C/T:<br>0.000              | T/T:<br>0.000              |                  | T: -                     | -                          | -                                  | -                          | T:<br>0.025 |  |                |
| rs3743674   | 44               | T:<br>0.727              | C/C:<br>0.136                      | C/T:<br>0.273              | T/T:<br>0.591              | 694 <sup>c</sup> | T:<br>0.776 <sup>c</sup> | -                          | -                                  | -                          | T:<br>0.675 |  |                |
| rs33932809  | 44               | T:<br>0.023              | C/C:<br>0.954                      | C/T:<br>0.045              | T/T:<br>0.000              | 46               | T:<br>0.000              | C/C:<br>1.000              | C/T:<br>0.000                      | T/T:<br>0.000              | T:<br>0.025 |  |                |
| rs368884824 | -                | -                        | -                                  | -                          | -                          | 694 <sup>c</sup> | A:<br>0.001 <sup>c</sup> | -                          | -                                  | -                          | A:<br>0.025 |  |                |
| rs33963999  | 42               | C:<br>0.000              | G/G:<br>1.000                      | G/C:<br>0.000              | C/C:<br>0.000              | 46               | C:<br>0.000              | G/G:<br>0.956              | G/C:<br>0.043                      | C/C:<br>0.000              | C:<br>0.025 |  |                |
| rs35741240  | 44               | C:<br>0.000              | G/G:<br>1.000                      | G/C:<br>0.000              | C/C:<br>0.000              |                  | -                        | -                          | -                                  | -                          | C:<br>0.025 |  |                |
| rs2276330   | 100 <sup>a</sup> | C:<br>0.090 <sup>a</sup> | T/T:<br>0.860 <sub>a</sub>         | T/C:<br>0.100 <sub>a</sub> | C/C:<br>0.040 <sup>a</sup> | 44               | C:<br>0.023              | T/T:<br>0.954              | T/C:<br>0.045                      | C/C:<br>0.000              | C:<br>0.100 |  |                |
| rs1801552   | 100 <sup>a</sup> | T:<br>0.310 <sup>a</sup> | C/C:<br>0.479 <sup>a</sup>         | T/C:<br>0.419 <sub>a</sub> | T/T:<br>0.101 <sup>a</sup> | 46               | T:<br>0.435              | C/C:<br>0.304              | T/C:<br>0.522                      | T/T:<br>0.174              | T:<br>0.725 |  |                |
| rs35686369  | -                | -                        | -                                  | -                          | -                          | 46               | A:<br>0.065              | -/-:<br>0.913              | -/+:<br>0.043                      | +/+:<br>0.043              | A:<br>0.5   |  |                |
| rs33964119  | 44               | T:<br>0.114              | C/C:<br>0.773                      | C/T:<br>0.227              | T/T:<br>0.00               | 44               | T:<br>0.091              | C/C:<br>0.864              | C/T:<br>0.091                      | T/T:<br>0.045              | T:<br>0.1   |  |                |
| rs33965115  | 42               | A:<br>0.023              | G/G:<br>0.952                      | G/A:<br>0.047              | A/A:<br>0.00               | 46               | A:<br>0.065              | G/G:<br>0.870              | G/A:<br>0.130                      | A/A:<br>0.00               | A:<br>0.05  |  |                |
| rs1801026   | 42               | T:<br>0.214              | C/C:<br>0.571                      | C/T:<br>0.428              | T/T:<br>0.00               | 45               | T:<br>0.195              | C/C:<br>0.695              | C/T:<br>0.217                      | T/T:<br>0.087              | T:<br>0.125 |  |                |

\* Frequency of the alternative allele in DGC and MGC patients (2n=40). <sup>a</sup>HAPMAP-MEX.

<sup>b</sup>Frequency reported in mexican population (Bustos-Carpinteyro, 2016) [18]. <sup>c</sup> AMR Population AMR: American.
